# Supplementary material for: Noise incorporated subwindow permutation analysis for informative gene selection using support vector machines
Source: Royal Society of Chemistry journal article supplement (doi:10.1039/c0an00667j), 2011-01-01
Supplement: c0an00667j.pdf [file c0an00667j.pdf]

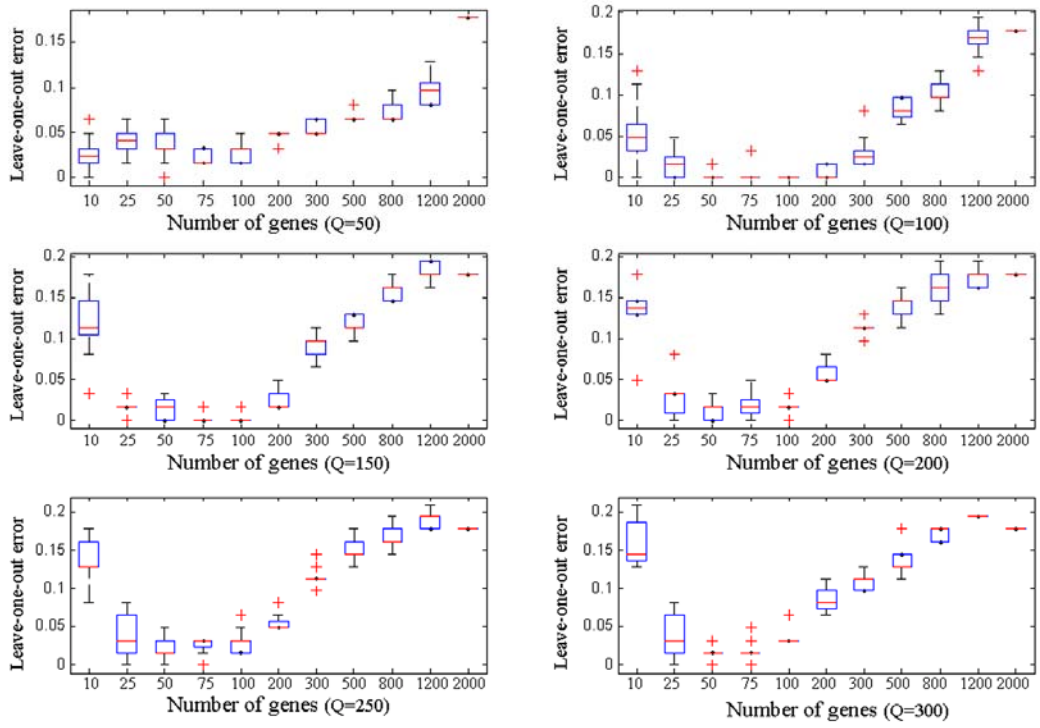

Figure S1. the results of reproducibility test of 20 runs of NISPA for colon dataset when  $Q=50, 100, 150, 200, 250$  and  $300$ , respectively.

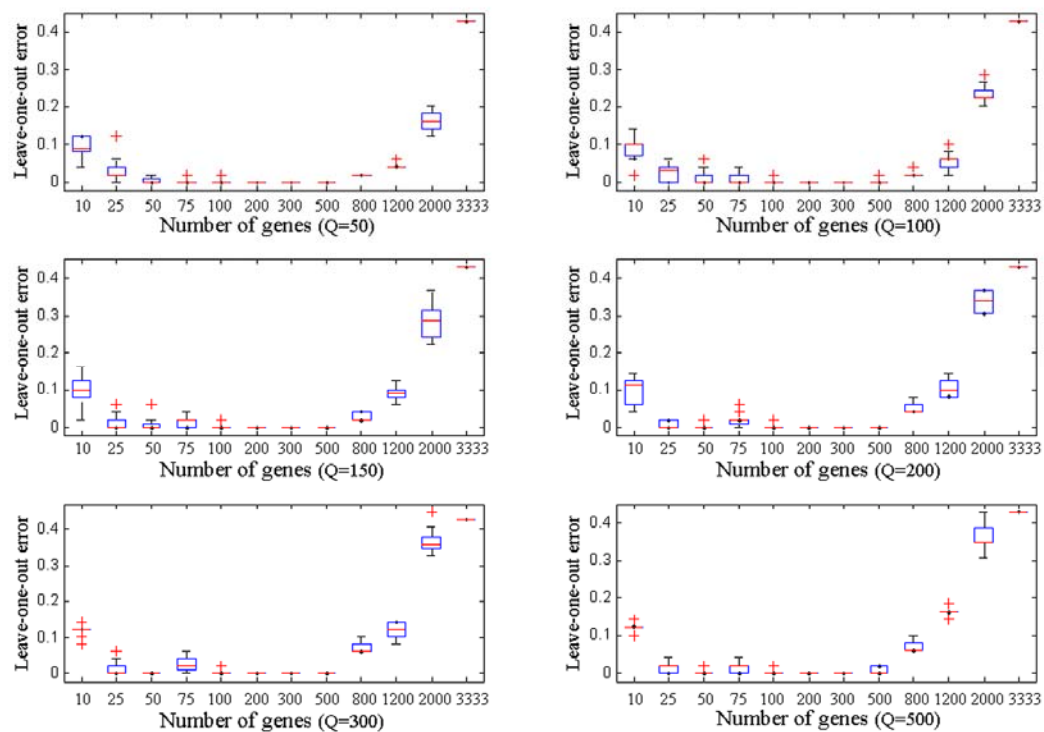

Figure S2. the results of reproducibility test of 20 runs of NISPA for estrogen dataset when  $Q=50, 100, 150, 200, 300$  and  $500$ , respectively.
